# Supplementary material for: Modelling preeclampsia: a comparative analysis of the common human trophoblast cell lines
Source: PubMed Central journal article supplement — FASEB Bioadv. 2020 Nov 21;3(1):23–35. doi: 10.1096/fba.2020-00057 (PMC7805545; doi:10.1096/fba.2020-00057), 2020-11-21
Supplement: FBA2-3-23-s001.pdf [file FBA2-3-23-s001.pdf]

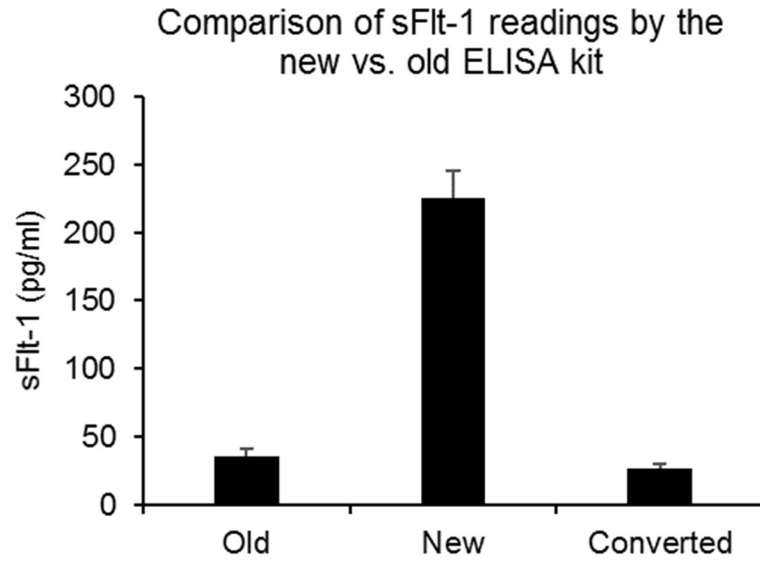

**Supplementary Figure S1.** Comparison of sFlt-1 measurements using the new (#DVR100C) and old (#DVR100B) ELISA kits from R&D Systems. The same set of trophoblast culture supernatant samples were used. Data represent three independent assays, each in duplicate. “Converted”: readings by the new kit was converted to the old kit using the formula  $y = 7.2175x + 32.06$  (y, new kit and x, old kit).

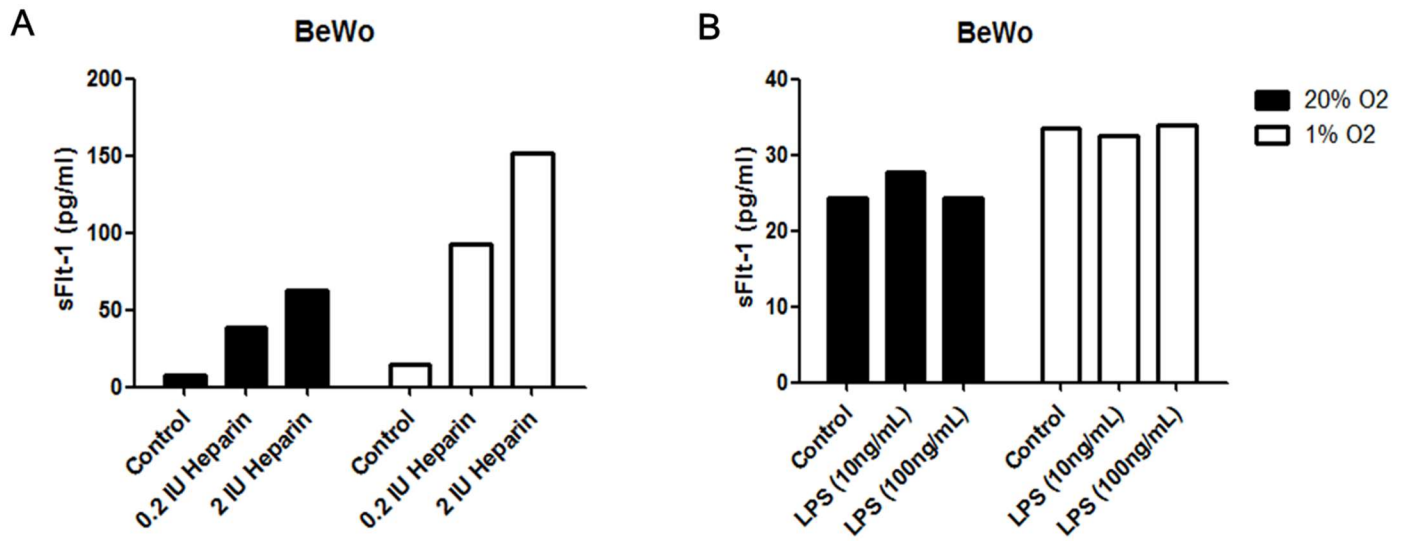

**Supplementary Figure S2. A:** Heparin treatment increased sFlt-1 protein levels in the supernatant from BeWo cells in a concentration-dependent manner, under both normoxia and hypoxia conditions. **B:** Lipopolysaccharides (LPS) did not affect sFlt-1 protein levels in the supernatant from BeWo cells, under either normoxia or hypoxia. Data from two independent experiments, each in duplicate.
